# Supplementary material for: Pre-collapse motion of the February 2021 Chamoli rock–ice avalanche, Indian Himalaya
Source: Copernicus journal article supplement (doi:10.5194/nhess-22-3309-2022), 2022-10-13
Supplement: Supplementary file 1 [file nhess-22-3309-2022-supplement.zip]

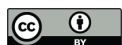

*Supplement of*

## **Pre-collapse motion of the February 2021 Chamoli rock–ice avalanche, Indian Himalaya**

**Maximillian Van Wyk de Vries et al.**

*Correspondence to:* Maximillian Van Wyk de Vries ([vanwy048@umn.edu](mailto:vanwy048@umn.edu))

- [nhess-22-3309-2022-supplement-title-page.pdf](#)
- [MVWDV\\_Chamoli\\_supplement.xlsx](#)

The copyright of individual parts of the supplement might differ from the article licence.
